# Supplementary material for: Modulating Cognitive–Motor Multitasking with Commercial-off-the-Shelf Non-Invasive Brain Stimulation
Source: MDPI journal article supplement (doi:10.3390/brainsci12020180), 2022-01-29
Supplement: s1 [file s1]

**Table S1.** Postural sway descriptive statistics.

| Surface | Cognitive Load   | Stimulation Type |       |       |       |
|---------|------------------|------------------|-------|-------|-------|
|         |                  | Active           |       | Sham  |       |
|         |                  | Mean             | SD    | Mean  | SD    |
| Firm    | Baseline         | 0.084            | 0.045 | 0.100 | 0.044 |
|         | Processing speed | 0.075            | 0.035 | 0.084 | 0.039 |
|         | EF Shifting      | 0.077            | 0.036 | 0.079 | 0.039 |
|         | EF Updating      | 0.066            | 0.024 | 0.074 | 0.037 |
|         | EF Inhibition    | 0.058            | 0.021 | 0.063 | 0.028 |
| Foam    | Baseline         | 0.090            | 0.033 | 0.101 | 0.034 |
|         | Processing speed | 0.103            | 0.045 | 0.118 | 0.052 |
|         | EF Shifting      | 0.091            | 0.030 | 0.098 | 0.034 |
|         | EF Updating      | 0.089            | 0.033 | 0.099 | 0.045 |
|         | EF Inhibition    | 0.079            | 0.028 | 0.086 | 0.026 |

**Table S2.** Cognitive task descriptive statistics.

| Surface | Cognitive Load   | Stimulation Type |      |      |      |
|---------|------------------|------------------|------|------|------|
|         |                  | Active           |      | Sham |      |
|         |                  | Mean             | SD   | Mean | SD   |
| Firm    | Processing speed | 328              | 41   | 335  | 33   |
|         | EF Shifting      | 186              | 122  | 130  | 93   |
|         | EF Updating      | 0.90             | 0.09 | 0.92 | 0.09 |
|         | EF Inhibition    | 144              | 112  | 117  | 80   |
| Foam    | Processing speed | 336              | 45   | 334  | 31   |
|         | EF Shifting      | 184              | 129  | 164  | 91   |
|         | EF Updating      | 0.92             | 0.08 | 0.91 | 0.08 |
|         | EF Inhibition    | 115              | 79   | 115  | 69   |

**Table S3:** Inferential statistics for balance performance

|                                           | <i>F</i> | <i>df</i> | <i>p</i> | $\eta^2_p$ |
|-------------------------------------------|----------|-----------|----------|------------|
| Surface Stability                         | 34.74    | 1,50      | < .001   | 0.41       |
| Cognitive Load                            | 8.49     | 4,200     | < .001   | 0.15       |
| Surface Stability x Cognitive Load        | 2.61     | 4,200     | 0.04     | 0.05       |
| Stim                                      | 4.53     | 1,50      | 0.04     | 0.08       |
| Stim x Surface Stability                  | 0.00     | 1,50      | 0.99     | 0.00       |
| Stim x Cognitive Load                     | 1.51     | 4,200     | 0.20     | 0.03       |
| Stim x Surface Stability x Cognitive Load | 0.67     | 4,200     | 0.62     | 0.01       |

**Table S4:** Inferential statistics for cognitive performance

|                         |                          | <i>F</i> | <i>df</i> | <i>p</i> | $\eta^2_p$ |
|-------------------------|--------------------------|----------|-----------|----------|------------|
| Non-EF Processing Speed | Surface Stability        | 1.45     | 1,50      | 0.23     | 0.03       |
|                         | Stim                     | 0.05     | 1,50      | 0.82     | < .001     |
|                         | Stim x Surface Stability | 2.07     | 1,50      | 0.16     | 0.04       |
| EF Shifting             | Surface Stability        | 0.79     | 1,50      | 0.38     | 0.02       |
|                         | Stim                     | 2.24     | 1,50      | 0.14     | 0.04       |
|                         | Stim x Surface Stability | 0.99     | 1,50      | 0.32     | 0.02       |
| EF Updating             | Surface Stability        | 0.32     | 1,50      | 0.58     | 0.01       |
|                         | Stim                     | 0.11     | 1,50      | 0.75     | < .001     |
|                         | Stim x Surface Stability | 1.07     | 1,50      | 0.31     | 0.02       |
| EF Inhibition           | Surface Stability        | 1.42     | 1,50      | 0.24     | 0.03       |
|                         | Stim                     | 0.41     | 1,50      | 0.53     | 0.01       |
|                         | Stim x Surface Stability | 1.07     | 1,50      | 0.31     | 0.02       |
